# Supplementary material
Source: PubMed Central journal article supplement (PMC4195554)

## SUPPLEMENTARY DATA

FIG. S1. Size exclusion chromatography profiles of the sub-fractions of the P extract from *P. canaliculata*.

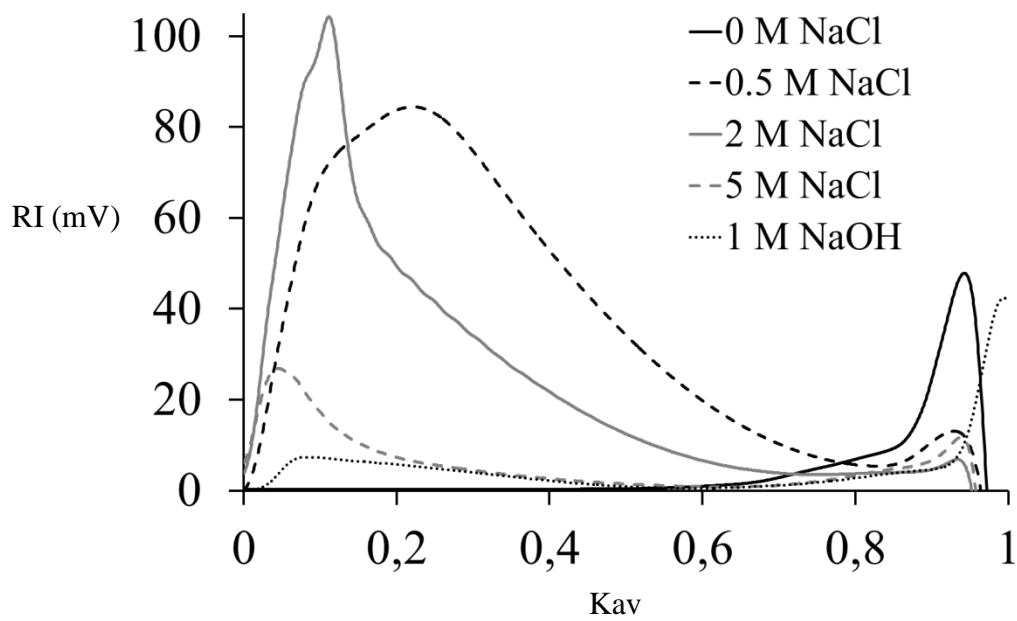

FIG. S2. COSY-DQF spectra of the AmbWH fucan fraction from *H. elongata*.

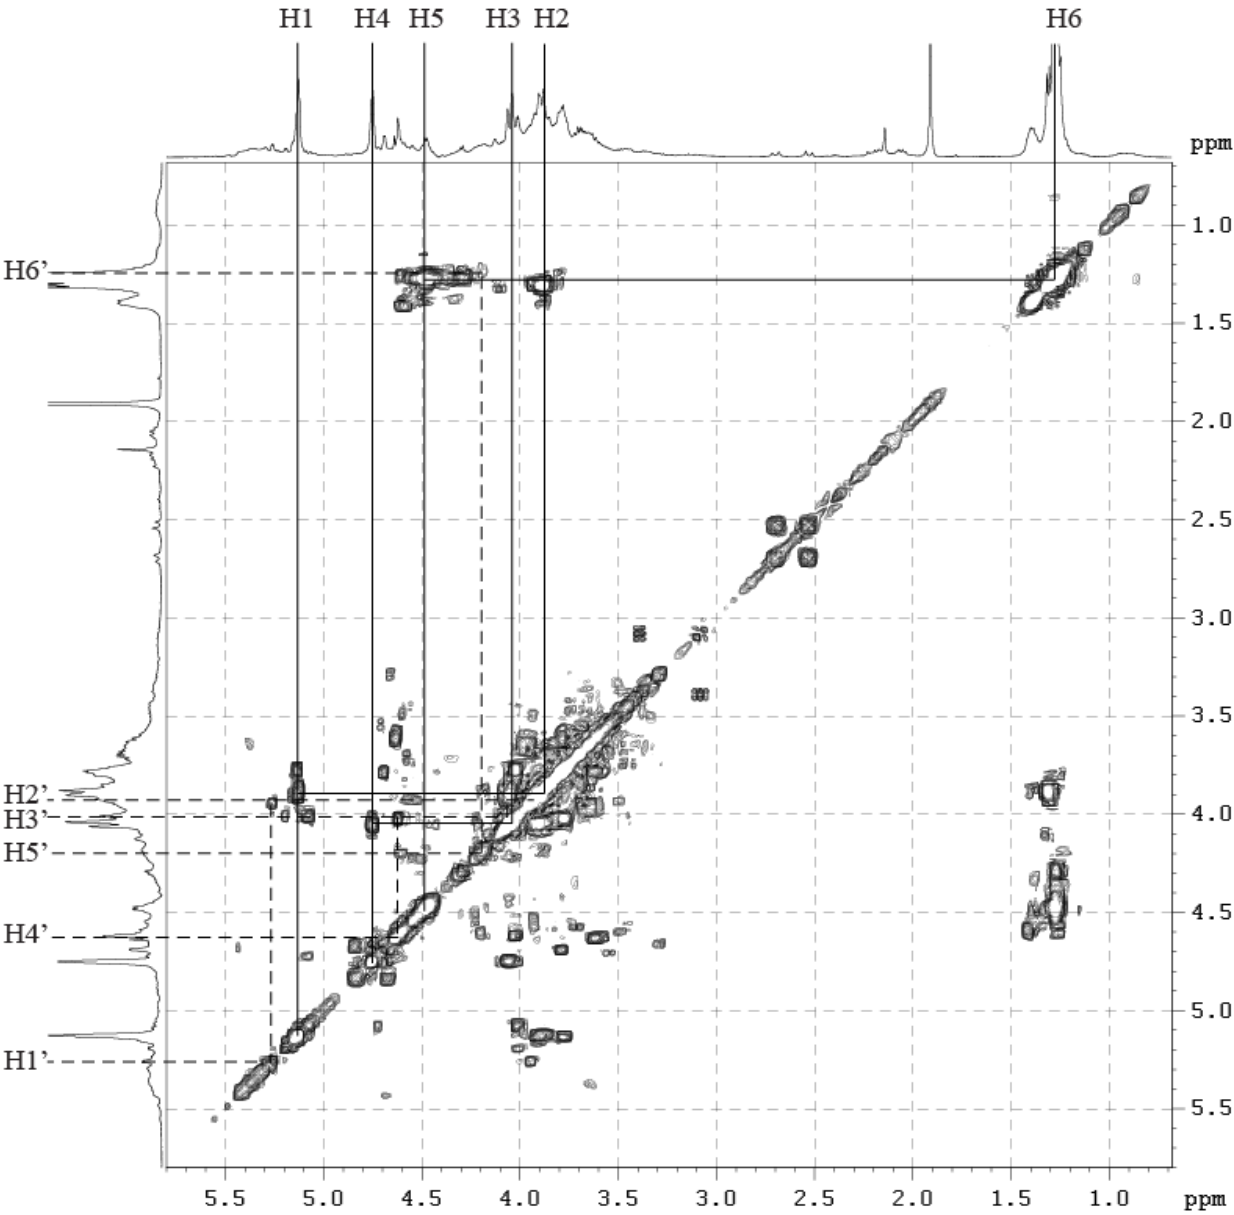

Supplement: supp_mcu096_mcu096supp.pdf [file supp_mcu096_mcu096supp.pdf]
